# Supplementary material for: Social interaction in augmented reality
Source: PLoS One. 2019 May 14;14(5):e0216290. doi: 10.1371/journal.pone.0216290 (PMC6516797; doi:10.1371/journal.pone.0216290)
Supplement: S1 Data — (CSV) [file pone.0216290.s005.csv]

score	participant	difficulty	vh	anagrams	order
3	2	E	A	B	1
4	2	E	P	A	2
2	2	H	P	C	3
2	2	H	A	D	4
6	3	H	P	D	1
10	3	E	P	A	2
9	3	E	A	B	3
8	3	H	A	C	4
5	5	H	A	C	1
10	5	E	P	B	2
10	5	E	A	A	3
2	5	H	P	D	4
10	7	E	P	B	1
8	7	H	P	D	2
10	7	E	A	A	3
10	7	H	A	C	4
10	8	E	P	A	1
2	8	H	P	D	2
10	8	E	A	B	3
7	8	H	A	C	4
4	9	H	A	C	1
10	9	E	P	A	2
10	9	H	P	D	3
10	9	E	A	B	4
10	10	E	P	B	1
8	10	H	P	D	2
10	10	H	A	C	3
10	10	E	A	A	4
5	11	E	A	A	1
4	11	E	P	B	2
5	11	H	P	C	3
3	11	H	A	D	4
1	12	H	P	D	1
10	12	E	A	B	2
6	12	H	A	C	3
9	12	E	P	A	4
2	14	H	P	D	1
1	14	H	A	C	2
4	14	E	P	B	3
5	14	E	A	A	4
10	18	E	P	B	1
9	18	H	A	C	2
10	18	E	A	A	3
6	18	H	P	D	4
9	19	E	P	B	1
6	19	H	A	C	2
10	19	E	A	A	3
4	19	H	P	D	4
4	20	H	A	D	1
5	20	H	P	C	2
9	20	E	P	B	3
10	20	E	A	A	4
5	21	E	P	B	1
7	21	E	A	A	2
4	21	H	A	C	3
4	21	H	P	D	4
3	22	H	A	C	1
6	22	E	P	A	2
7	22	E	A	B	3
5	22	H	P	D	4
8	23	E	A	A	1
2	23	H	P	D	2
3	23	H	A	C	3
7	23	E	P	B	4
10	24	E	P	B	1
8	24	H	A	D	2
8	24	H	P	C	3
10	24	E	A	A	4
5	25	H	P	D	1
10	25	E	P	B	2
10	25	E	A	A	3
9	25	H	A	C	4
10	26	E	A	B	1
2	26	H	P	D	2
10	26	E	P	A	3
3	26	H	A	C	4
10	27	E	P	B	1
10	27	E	A	A	2
5	27	H	A	C	3
7	27	H	P	D	4
9	28	H	A	C	1
10	28	E	P	A	2
6	28	H	P	D	3
10	28	E	A	B	4
4	29	E	P	B	1
2	29	H	A	D	2
6	29	E	A	A	3
1	29	H	P	C	4
3	30	H	P	C	1
6	30	E	A	B	2
5	30	H	A	D	3
9	30	E	P	A	4
4	31	H	A	D	1
10	31	E	A	B	2
6	31	E	P	A	3
5	31	H	P	C	4
5	32	E	A	A	1
5	32	H	P	C	2
2	32	H	A	D	3
7	32	E	P	B	4
1	33	H	P	C	1
6	33	E	A	A	2
2	33	H	A	D	3
5	33	E	P	B	4
10	34	E	P	A	1
8	34	H	A	C	2
7	34	H	P	D	3
10	34	E	A	B	4
7	38	H	A	D	1
9	38	E	A	A	2
10	38	E	P	B	3
7	38	H	P	C	4
5	39	E	A	B	1
3	39	H	A	C	2
6	39	H	P	D	3
9	39	E	P	A	4
10	41	E	A	B	1
3	41	H	A	D	2
7	41	E	P	A	3
4	41	H	P	C	4
7	42	E	A	A	1
6	42	E	P	B	2
1	42	H	P	C	3
1	42	H	A	D	4
8	43	E	P	A	1
4	43	H	P	C	2
5	43	H	A	D	3
10	43	E	A	B	4
10	44	E	A	A	1
4	44	H	A	D	2
10	44	E	P	B	3
8	44	H	P	C	4
5	45	H	P	D	1
6	45	E	P	B	2
4	45	H	A	C	3
6	45	E	A	A	4
8	46	E	P	A	1
9	46	E	A	B	2
3	46	H	P	D	3
0	46	H	A	C	4
3	47	H	A	D	1
1	47	H	P	C	2
6	47	E	A	B	3
4	47	E	P	A	4
2	48	H	A	C	1
5	48	E	A	A	2
4	48	H	P	D	3
9	48	E	P	B	4
2	49	H	P	C	1
7	49	E	A	A	2
9	49	E	P	B	3
4	49	H	A	D	4
4	51	H	A	C	1
8	51	E	P	B	2
1	51	H	P	D	3
6	51	E	A	A	4
0	52	H	P	C	1
1	52	E	A	B	2
1	52	H	A	D	3
0	52	E	P	A	4
6	53	E	A	B	1
4	53	E	P	A	2
0	53	H	P	C	3
2	53	H	A	D	4
8	55	E	A	A	1
5	55	H	P	C	2
10	55	E	P	B	3
4	55	H	A	D	4
3	59	H	A	D	1
8	59	E	P	A	2
8	59	E	A	B	3
4	59	H	P	C	4
0	61	H	P	D	1
0	61	H	A	C	2
2	61	E	P	A	3
1	61	E	A	B	4
7	62	E	A	B	1
3	62	H	A	D	2
7	62	H	P	C	3
10	62	E	P	A	4
6	64	H	A	C	1
6	64	H	P	D	2
10	64	E	P	B	3
10	64	E	A	A	4
5	66	H	P	C	1
10	66	E	A	A	2
8	66	H	A	D	3
10	66	E	P	B	4
1	68	H	A	D	1
3	68	H	P	C	2
8	68	E	A	A	3
9	68	E	P	B	4
6	69	E	A	B	1
3	69	H	P	D	2
6	69	E	P	A	3
5	69	H	A	C	4
10	70	E	P	A	1
3	70	H	A	D	2
9	70	H	P	C	3
10	70	E	A	B	4
1	71	H	P	C	1
2	71	H	A	D	2
6	71	E	A	B	3
5	71	E	P	A	4
9	73	E	P	A	1
3	73	H	P	C	2
7	73	E	A	B	3
3	73	H	A	D	4
5	74	E	A	A	1
5	74	H	A	C	2
5	74	E	P	B	3
2	74	H	P	D	4
2	75	H	P	C	1
3	75	H	A	D	2
3	75	E	P	A	3
6	75	E	A	B	4
